# Supplementary material
Source: Springer Nature journal article supplement (https://www.springermedizin.de/resource/supplementary/12936_2011_1798_MOESM1_ESM.pdf/9541804)

**A**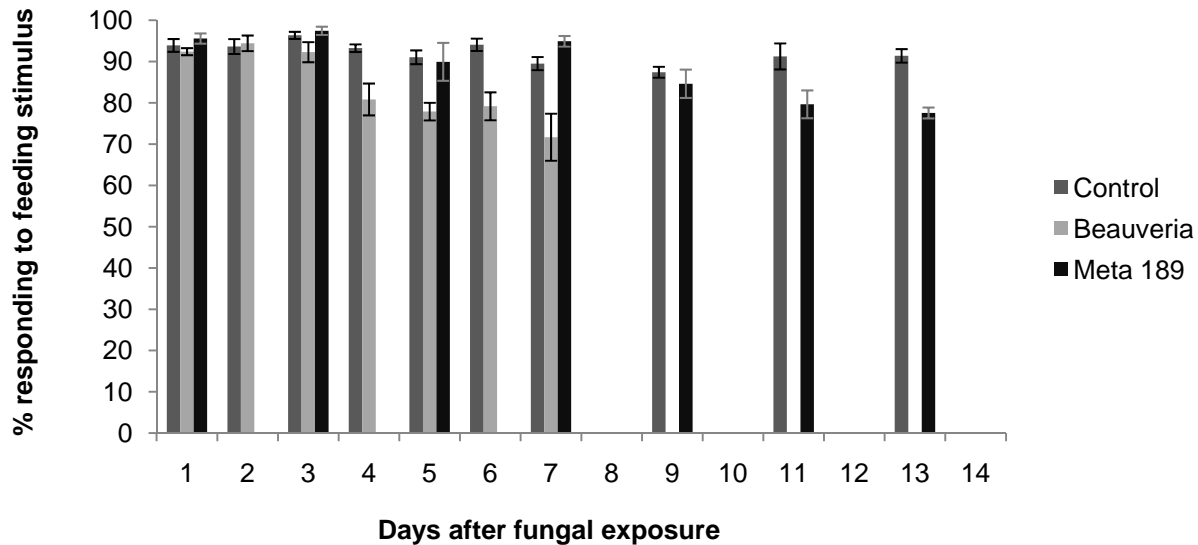**B**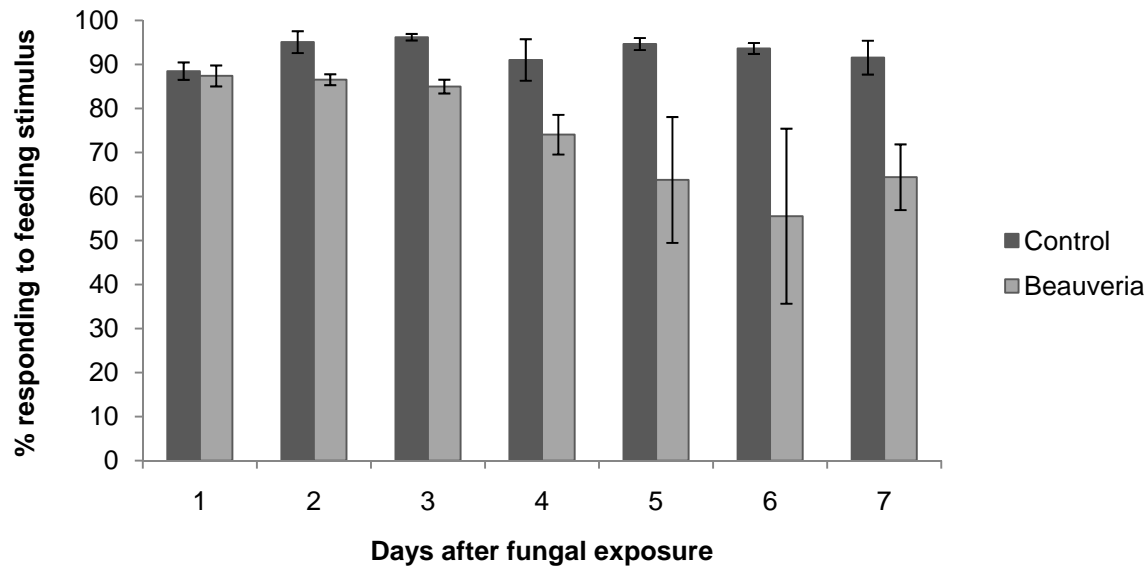

Supplement: MOESM1 [file 9541804]
